# Supplementary material for: Electrochemical detection of a pathogenic Escherichia coli specific DNA sequence based on a graphene oxide–chitosan composite decorated with nickel ferrite nanoparticles
Source: Royal Society of Chemistry journal article supplement (doi:10.1039/c5ra07298k), 2015-01-01
Supplement: c5ra07298k1.pdf [file c5ra07298k1.pdf]

**Electrochemical detection of pathogenic *Escherichia coli* specific DNA sequence based on graphene oxide- chitosan composite decorated with nickel ferrite nanoparticles**

Ida Tiwari, Monali Singh, Chandra Mouli Pandey, Gajjala Sumana

**Supplementary information**

**Figure S1 Raman spectra of (A) GO (B) GO/NiF/ch nanocomposite**

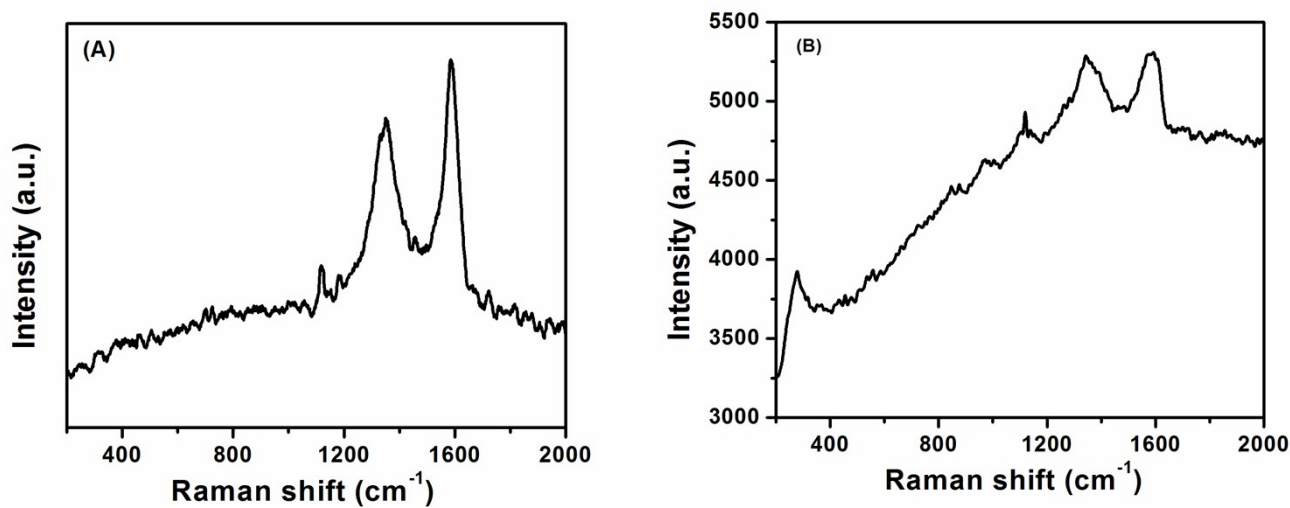

**Figure S2 TGA spectra of (i) GO (ii) GO/NiF/ch nanocomposite**

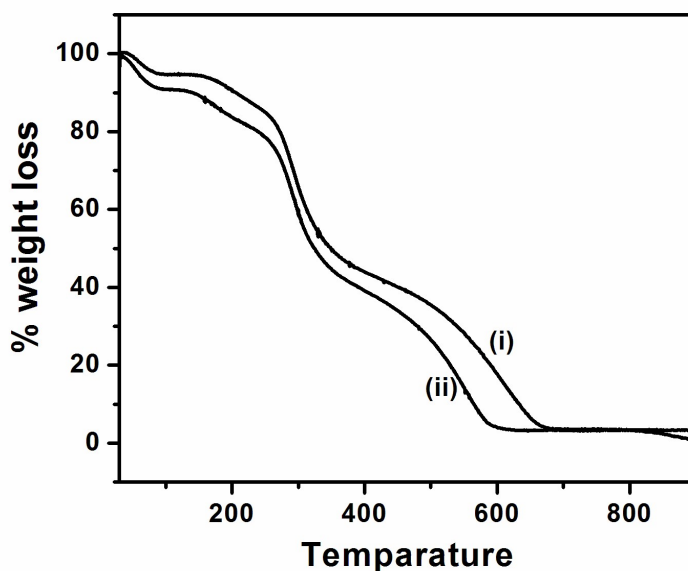

Figure S3 Comparison of cyclic voltamogram of (i) GO/NiF/ch/ITO electrode and (ii) pDNA/ GO/NiF/ch/ITO electrode in PBS (100 mM, pH 7.4, 0.9% NaCl) solution containing 5 mM  $[\text{Fe}(\text{CN})_6]$

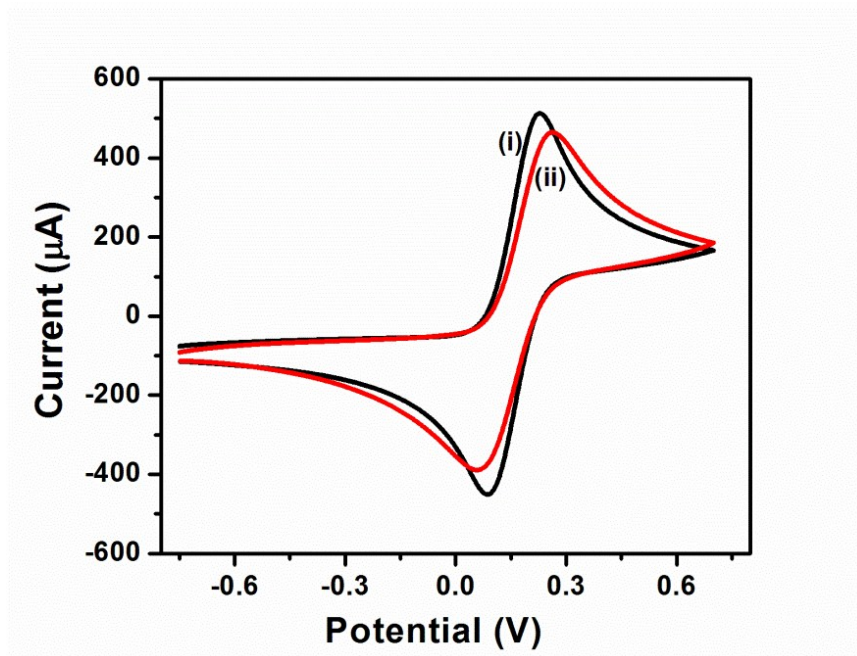

Figure S4 DPV response of pDNA/ GO/NiF/ch/ITO bioelectrode incubated with (i) non complementary, (ii) pDNA (iii) one base mismatch sequence (iv) complementary

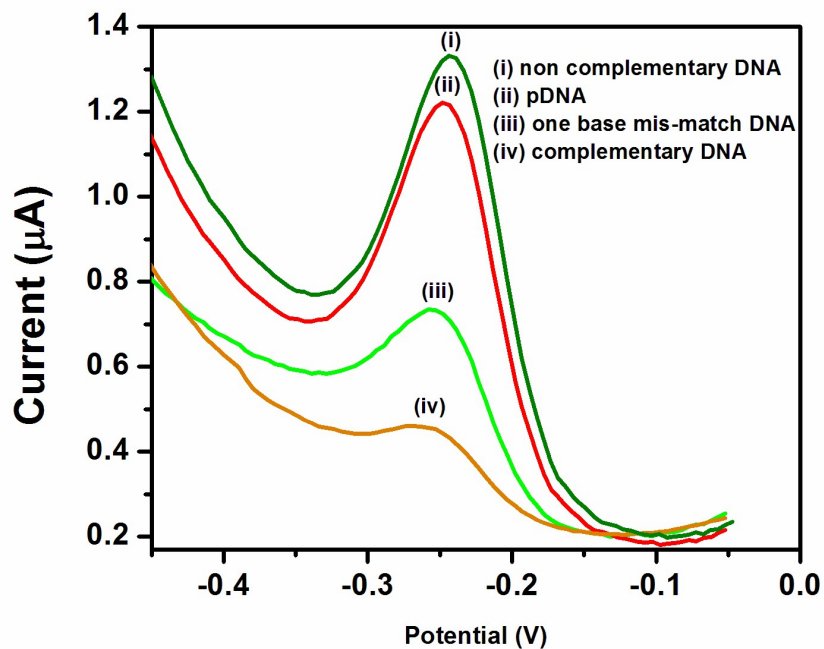

Figure S5 Bar diagram showing DPV response of pDNA/ GO/NiF/ch/ITO bioelectrode incubated with the culture samples of water borne pathogens

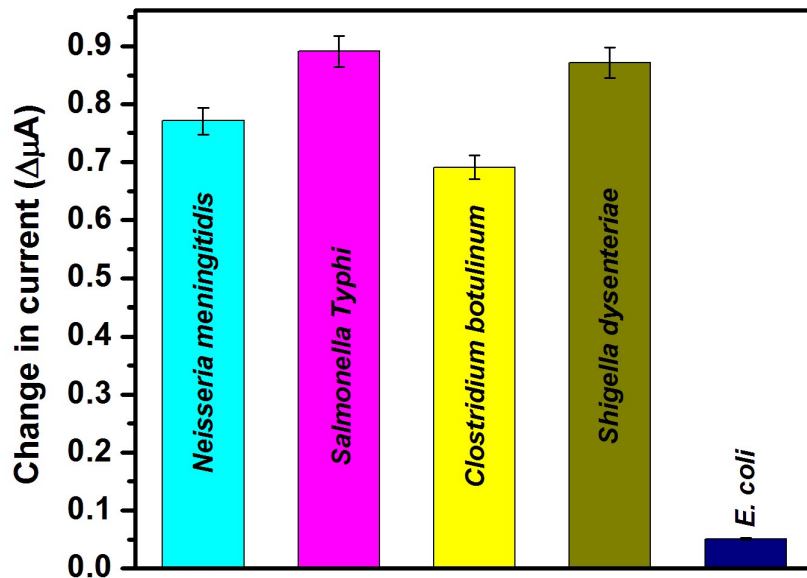

Figure S6 (A) Percentage change in peak current of the fabricated pDNA/ GO/NiF/ch/ITO bioelectrode towards *E. coli* O157:H7 detection every five days (B) Bar diagram showing the stability of the fabricated pDNA/ GO/NiF/ch/ITO bioelectrode

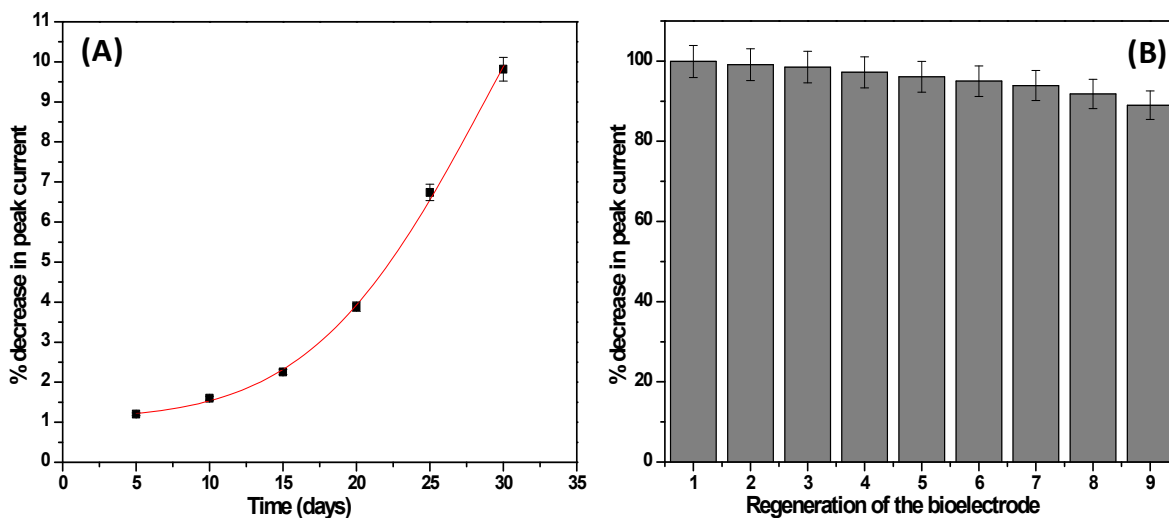

**Table ST1 Comparison of response characteristics of pDNA/GIOCh/ITO bioelectrode with other DNA sensors**

| S. No | Modified electrode                                                               | Detection techniques | Detection limit            | Detection range                                       | Response time | Reference    |
|-------|----------------------------------------------------------------------------------|----------------------|----------------------------|-------------------------------------------------------|---------------|--------------|
| 1.    | chitosan/Fe <sub>3</sub> O <sub>4</sub> /graphene/ carbon ionic liquid electrode | EIS                  | 3.59×10 <sup>-13</sup> M   | 1.0×10 <sup>-12</sup> to 1.0 × 10 <sup>-6</sup> M     | -             | 1            |
| 2.    | Label-free DNA/reduced graphene oxide                                            | FS                   | 5 × 10 <sup>-8</sup> M     | 0.31–2.5 x 10 <sup>-6</sup> M                         | -             | 2            |
| 3.    | Graphene/IONPs/chit                                                              | EIS                  | 1 × 10 <sup>-14</sup> M    | 1.0 x 10 <sup>-14</sup> to 1.0 x 10 <sup>-6</sup> M   | -             | 3            |
| 4.    | Ph-NH <sub>2</sub> /GO/GCE                                                       | EIS                  | 0.11 x 10 <sup>-12</sup> M | 0.001–10 <sup>-7</sup> M                              | -             | 4            |
| 5.    | CeO <sub>2</sub> /Chit/GCE                                                       | DPV                  | 10 x 10 <sup>-12</sup> M   | 0.0159–0.116 × 10 <sup>-9</sup> M                     | 25 min        | 5            |
| 6.    | 4-ATP/AuNPs/Au                                                                   | DPV                  | 9.5 x 10 <sup>-12</sup> M  | 0.014 x 10 <sup>-9</sup> M                            | -             | 6            |
| 7.    | PPy–PANi–GA/GE                                                                   | DPV                  | 5.0×10 <sup>-14</sup> M    | 1.0 × 10 <sup>-13</sup> to 1.0 × 10 <sup>-9</sup> M   | -             | 7            |
| 8.    | Au NRs–rGO/GCE                                                                   | DPV                  | 3.5×10 <sup>-15</sup> M    | 1.0 × 10 <sup>-14</sup> to 1.0 × 10 <sup>-9</sup> M   | 50 min        | 8            |
| 9.    | GO-CHI/ITO                                                                       | EIS                  | 1.0 x 10 <sup>-15</sup> M  | 1.0 x 10 <sup>-15</sup> M to 5.0 x 10 <sup>-8</sup> M | 60 s          | 9            |
| 10.   | Carboxyl functionalized graphene                                                 | DPV                  | 1.69×10 <sup>-13</sup> M   | 1.0×10 <sup>-12</sup> –1.0 × 10 <sup>-6</sup> M       | 4 hr          | 10           |
| 11.   | GO/NiF/ch                                                                        | DPV                  | 1 × 10 <sup>-16</sup> M    | 1 x 10 <sup>-6</sup> to 1 x 10 <sup>-16</sup> M       | 60 s          | Present work |

**Table ST2 Comparison of response characteristics of pDNA/GIOCh/ITO bioelectrode with other *E.coli* DNA sensors**

| S.No | Modified electrode          | Detection technique | Detection limit       | Detection range                                | Reference    |
|------|-----------------------------|---------------------|-----------------------|------------------------------------------------|--------------|
| 1.   | octadecanethiol (ODT)/ITO   | DPV                 | $5 \times 10^{-19}$ M | $0.5 \times 10^{-18}$ to $1 \times 10^{-6}$ M. | 11           |
| 3.   | GOx–Thi–Au@SiO <sub>2</sub> | Amperometry         | $1 \times 10^{-11}$ M | $2 \times 10^{-11}$ to $50.0 \times 10^{-7}$ M | 12           |
| 4.   | SH-DNA/MCH                  | DPV                 | $1 \times 10^{-12}$ M | $1 \times 10^{-12}$ to $1 \times 10^{-7}$ M    | 13           |
| 5.   | GO/NiF/ch                   | DPV                 |                       | $1 \times 10^{-6}$ to $1 \times 10^{-16}$ M    | Present work |

1. W. Sun, X. Qi, Y. Chen, S. Liu and H. Gao, *Talanta*, 2011, **87**, 106-112.
2. Y. Shi, W. T. Huang, H. Q. Luo and N. B. Li, *Chem. Comm.*, 2011, **47**, 4676-4678.
3. I. Tiwari, M. Singh, C. M. Pandey and G. Sumana, *Sens. Actuators ,B*, 2015, **206**, 276-283.
4. Y. Hu, F. Li, D. Han, T. Wu, Q. Zhang, L. Niu and Y. Bao, *Anal. Chim. Acta*, 2012, **753**, 82-89.
5. K.-J. Feng, Y.-H. Yang, Z.-J. Wang, J.-H. Jiang, G.-L. Shen and R.-Q. Yu, *Talanta*, 2006, **70**, 561-565.
6. G.-j. Li, L.-h. Liu, X.-w. Qi, Y.-q. Guo, W. Sun and X.-l. Li, *Electrochim. Acta*, 2012, **63**, 312-317.
7. S. Radhakrishnan, C. Sumathi, V. Dharuman and J. Wilson, *Anal. Methods*, 2013, **5**, 1010-1015.
8. Y. Zhang and W. Jiang, *Electrochim. Acta*, 2012, **71**, 239-245.
9. A. Singh, G. Sinsinbar, M. Choudhary, V. Kumar, R. Pasricha, H. N. Verma, S. P. Singh and K. Arora, *Sens. Actuators, B*, 2013, **185**, 675-684.
10. W. Sun, Y. Zhang, X. Ju, G. Li, H. Gao and Z. Sun, *Anal. Chim. Acta*, 2012, **752**, 39-44.
11. C. M. Pandey, R. Singh, G. Sumana, M. K. Pandey and B. D. Malhotra, *Sens. Actuators, B*, 2011, **151**, 333-340.
12. Y. Li, J. Deng, L. Fang, K. Yu, H. Huang, L. Jiang, W. Liang and J. Zheng, *Biosens. Bioelectron.*, 2015, **63**, 1-6.
13. K. Li, J. Huang, G. Shi, W. Zhang and L. Jin, *Anal. Lett.*, 2011, **44**, 2559-2570.
